# Supplementary material
Source: PubMed Central journal article supplement (PMC5191924)
Supplement: NIHMS817226-supplement-Supp_info.pdf [file NIHMS817226-supplement-Supp_info.pdf]

**SUPPORTING MATERIALS**

|                 | 7.0 Tesla   |             | 10.5 Tesla |             |
|-----------------|-------------|-------------|------------|-------------|
|                 | 1 spoke     | 2 spokes    | 1 spoke    | 2 spokes    |
| <b>Prostate</b> | 10.3 – 44.7 | 13.7 – 44.9 | 9.2 – 40.7 | 12.3 – 44.5 |
| <b>Kidneys</b>  | 10.6 – 43.0 | 14.5 – 44.6 | 8.4 – 36.3 | 11.6 – 43.1 |
| <b>Heart</b>    | 6.9 – 39.5  | 9.4 – 43.8  | 5.7 – 35.4 | 7.1 – 39.1  |

**Supporting Table S1.** Minimum - maximum average flip angle values achieved inside target anatomies using 1- and 2-spoke pulses using 7.0 and 10.5 T antenna arrays. The target flip angle during pulse design was 45°.

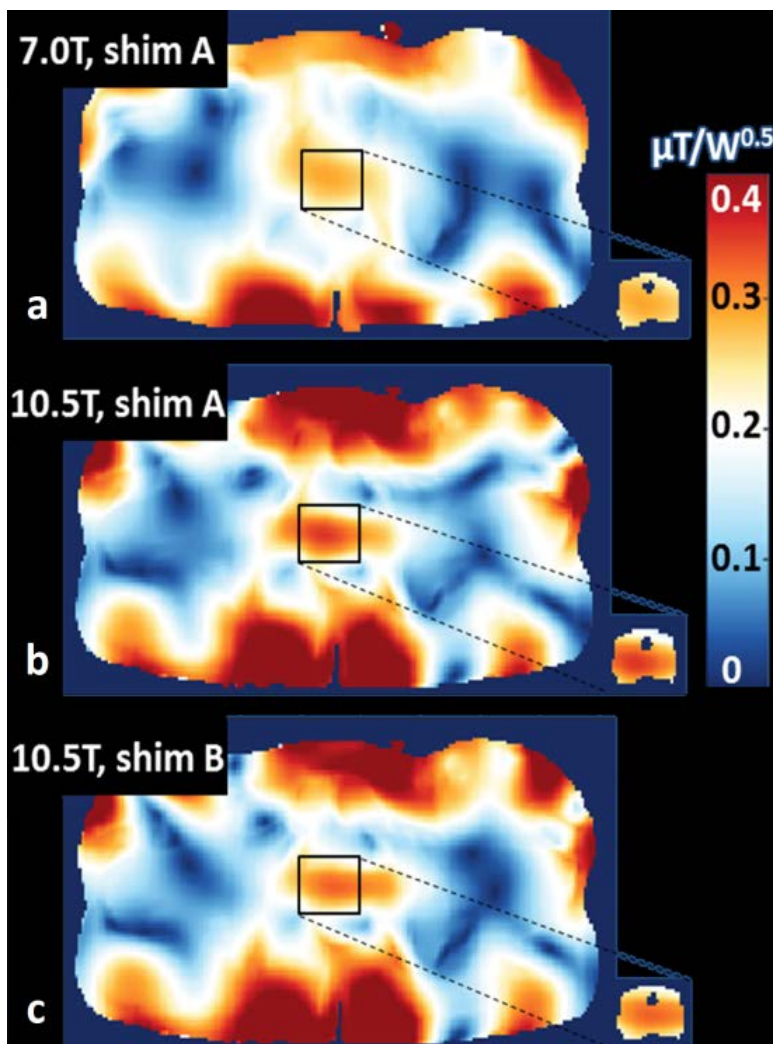

**Supporting Figure S1.** Simulated power efficiency distributions of phase-only efficiency shim solutions at (a) 7.0 and (b) 10.5 T. (c) Power efficiency distribution of an efficiency – field uniformity tradeoff solution at 10.5 T is shown. These phase-only shim solutions are annotated in Figure 4.

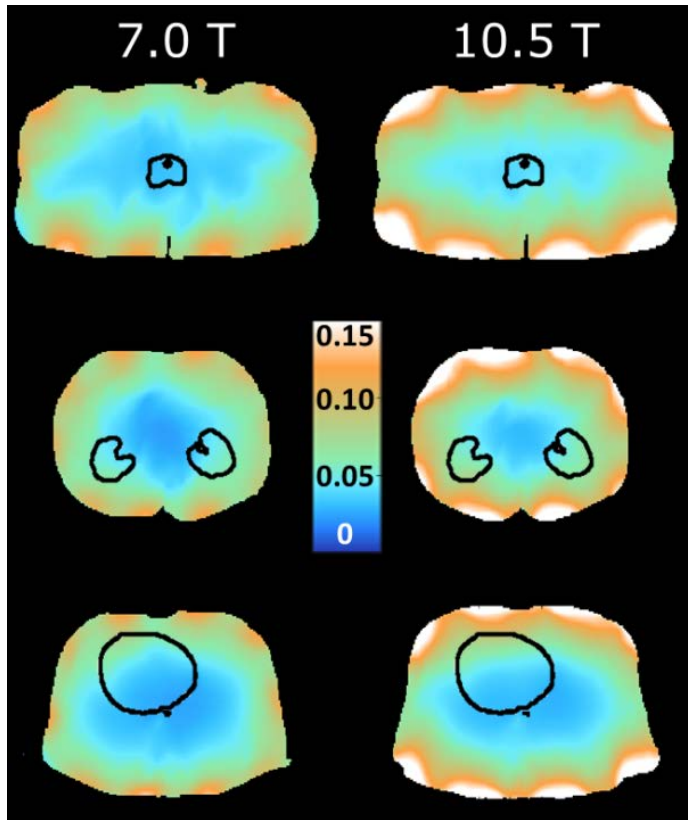

**Supporting Figure S2.** Numerically computed and RSOS combined  $B_1^-$  distributions along axial slices intersecting the prostate (top row), kidneys (middle row) and heart (bottom row) of Duke are shown for the 7.0 T and 10.5 T antenna arrays along left and right columns, respectively.

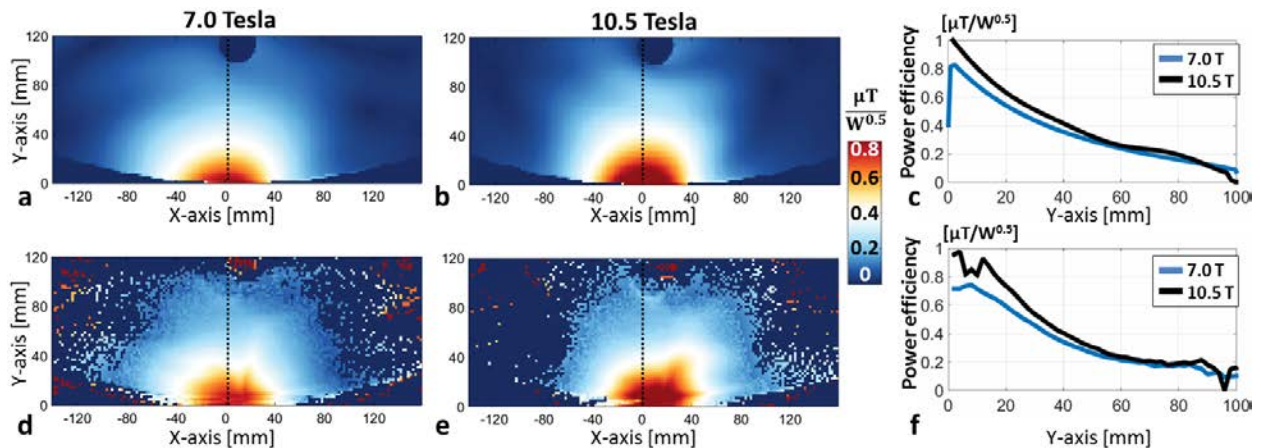

**Supporting Figure S3.** Simulated and measured power efficiency distributions of single dipole antenna elements are shown along a central axial slice inside a uniform saline phantom in top and bottom rows, respectively. (c) Power efficiency profiles along the annotated lines are plotted from numerical and (f) experimental maps.

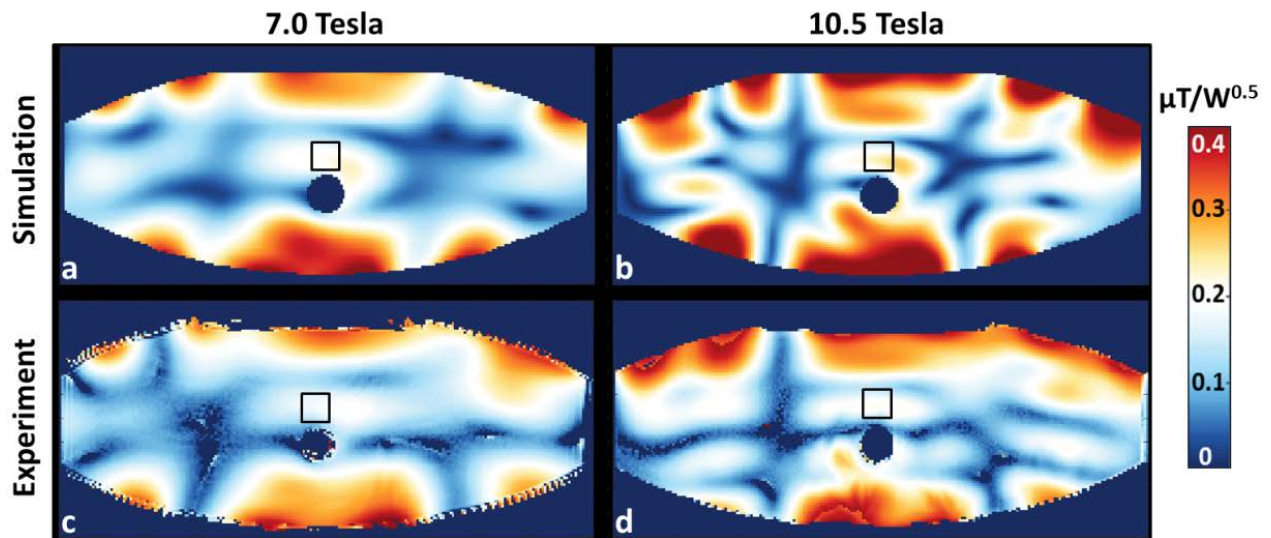

**Supporting Figure S4.** (a-b) Simulated and (c-d) measured power efficiency distributions at 7.0 and 10.5 tesla are shown. Phase-only efficiency shimming was performed inside annotated regions.

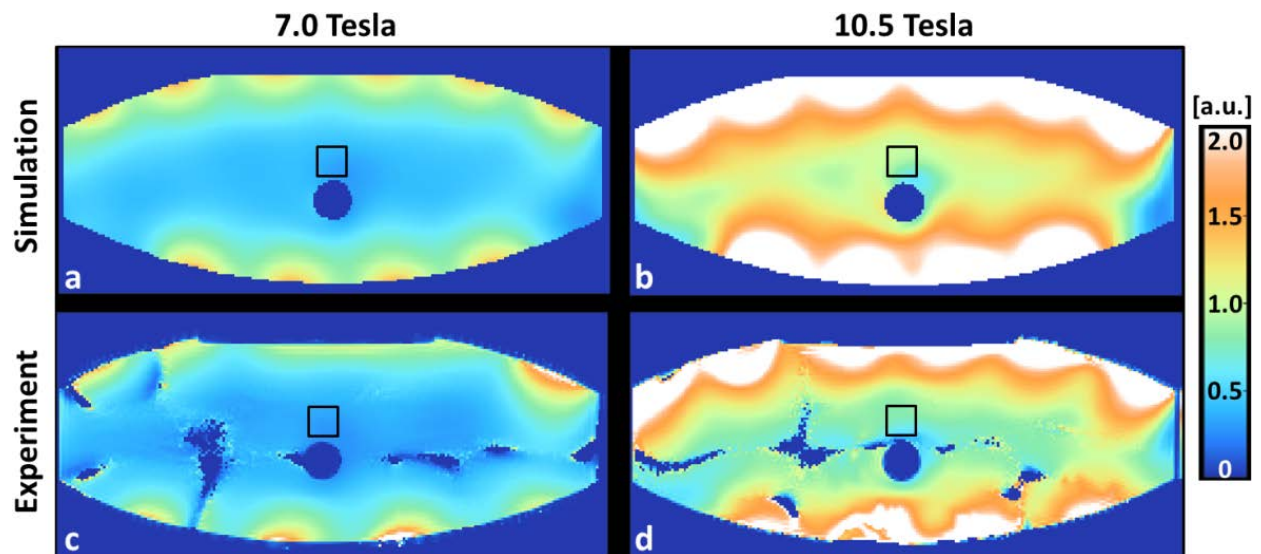

**Supporting Figure S5.** (a-b) Simulated and (c-d) measured SNR distributions at 7.0 and 10.5 tesla are shown. SNR gains of 2.39- and 2.26-fold are simulated and measured inside the annotated regions, respectively.

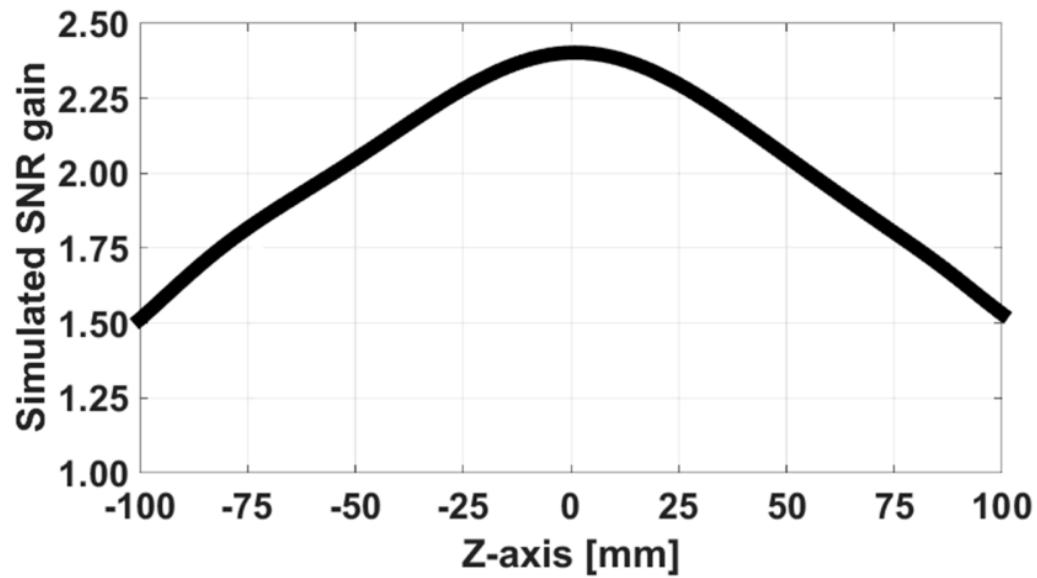

**Supporting Figure S6.** Numerically computed SNR gain at 10.5 T inside the annotated regions of the torso phantom (Supporting Figure S5) is plotted along z-dimension. More than 2.25-fold gain is observed in a 58 mm-wide region. SNR gains of 2- and 1.5-fold are observed in 110 and 200 mm-wide regions, respectively.
